# Supplementary material for: Molecular mechanisms behind the anti corona virus activity of small metal oxide nanoparticles
Source: Royal Society of Chemistry journal article supplement (doi:10.1039/d4nr03730h), 2025-01-01
Supplement: d4nr03730h1.pdf [file d4nr03730h1.pdf]

## Supplementary materials

# Molecular Mechanisms behind the Anti Corona Virus Activity of Small Metal Oxide Nanoparticles

Björn Greijer,<sup>a</sup> Alexandra Nefedova,<sup>b</sup> Tatiana Agback,<sup>a</sup> Peter Agback,<sup>a</sup> Vambola Kisand,<sup>b</sup> Kai Rausalu,<sup>c</sup> Alexander Vanetsev,<sup>b</sup> Gulaim A. Seisenbaeva,<sup>a</sup> Angela Ivask,<sup>d</sup> Vadim G. Kessler<sup>a\*</sup>

<sup>a</sup> Department of Molecular Science, BioCenter, Swedish University of Agricultural Sciences, Box 7015, 75007 Uppsala, Sweden

<sup>b</sup> Institute of Physics, University of Tartu, Ostwaldi 1, 50411, Tartu, Estonia

<sup>c</sup> Institute of Bioengineering, University of Tartu, Nooruse 1, 50411 Tartu, Estonia

<sup>d</sup> Institute of Molecular and Cell Biology, University of Tartu, Riia 23, 51010 Tartu, Estonia

**Table S1.** Calculated probability values from one-way ANOVA statistical analysis with Tukey post-hoc test of experimental results for TGEV and EMCV viruses inactivation by TATT titania and POM NPs. P-values are expressed as differences between log pfu/ml at NP exposures and negative (non-exposed) controls. Null hypothesis suggested statistical identity of NP exposures and non-exposed control unless shown otherwise. P-values < 0.05 (highlighted) were considered statistically significant.

| <b>TGEV</b>          |                          |                     |                |
|----------------------|--------------------------|---------------------|----------------|
| <b>TATT NPs</b>      | <b>p-value</b>           | <b>POM NPs</b>      | <b>p-value</b> |
| 1.25 mM vs control   | 4.52186·10 <sup>-8</sup> | 1.25 mM vs control  | 0.9674         |
| 0.125 mM vs control  | 6.31492·10 <sup>-5</sup> | 0.125 mM vs control | 0.81529        |
| 0.013 mM vs control  | 0.96317                  | 0.013 mM vs control | 1              |
| 0.001 mM vs control  | 0.77279                  | 0.001 mM vs control | 0.99999        |
| 0.125 mM vs. 1.25 mM | 0                        |                     |                |
| <b>EMCV</b>          |                          |                     |                |
| <b>TATT NPs</b>      | <b>p-value</b>           | <b>POM NPs</b>      | <b>p-value</b> |
| 1.25 mM vs control   | 0.99995                  | 1.25 mM vs control  | 1              |
| 0.125 mM vs control  | 1                        | 0.125 mM vs control | 1              |
| 0.013 mM vs control  | 1                        | 0.013 mM vs control | 1              |

**Table S2.** Crystallographic data for (HEPES)<sub>3</sub>(H<sub>3</sub>O)SiW<sub>12</sub>O<sub>40</sub>.

|                                                   |                                                                                                             |
|---------------------------------------------------|-------------------------------------------------------------------------------------------------------------|
| <b>Chemical formula</b>                           | C <sub>5</sub> H <sub>9</sub> N <sub>5</sub> O <sub>36</sub> S <sub>3</sub> Si <sub>3</sub> W <sub>12</sub> |
| <b>Formula weight</b>                             | 3101.82 g/mol                                                                                               |
| <b>Temperature</b>                                | 273(2) K                                                                                                    |
| <b>Wavelength</b>                                 | 0.71073 Å                                                                                                   |
| <b>Crystal system</b>                             | monoclinic                                                                                                  |
| <b>Space group</b>                                | P 1 21/c 1                                                                                                  |
| <b>Unit cell dimensions</b>                       | a = 32.191(3) Å     α = 90°<br>b = 14.8183(12) Å   β = 91.018(2)°<br>c = 15.3532(13) Å   γ = 90°            |
| <b>Volume</b>                                     | 7322.6(11) Å <sup>3</sup>                                                                                   |
| <b>Z</b>                                          | 4                                                                                                           |
| <b>Theta range for data collection</b>            | 2.28 to 32.49°                                                                                              |
| <b>Index ranges</b>                               | -48 ≤ h ≤ 47, -21 ≤ k ≤ 22, -23 ≤ l ≤ 22                                                                    |
| <b>Reflections collected</b>                      | 119465                                                                                                      |
| <b>Independent reflections</b>                    | 25909 [R(int) = 0.0967]                                                                                     |
| <b>Nr. of obs. independent refl; I &gt; 2σ(I)</b> | 17682                                                                                                       |
| <b>Final R indices, observed</b>                  | R1 = 0.0744, wR2 = 0.1830                                                                                   |
| <b>Final R-indices, all data</b>                  | R1 = 0.1114, wR2 = 0.1997                                                                                   |

**Table S3.** Crystallographic data for (HGly<sub>3</sub>)<sub>4</sub>SiW<sub>12</sub>O<sub>40</sub>.

---

|                                                   |                                                                                   |                  |
|---------------------------------------------------|-----------------------------------------------------------------------------------|------------------|
| <b>Chemical formula</b>                           | C <sub>24</sub> H <sub>44</sub> N <sub>12</sub> O <sub>56</sub> SiW <sub>12</sub> |                  |
| <b>Formula weight</b>                             | 3631.00 g/mol                                                                     |                  |
| <b>Temperature</b>                                | 273(2) K                                                                          |                  |
| <b>Wavelength</b>                                 | 0.71073 Å                                                                         |                  |
| <b>Crystal system</b>                             | triclinic                                                                         |                  |
| <b>Space group</b>                                | P -1                                                                              |                  |
| <b>Unit cell dimensions</b>                       | a = 10.8473(5) Å                                                                  | α = 99.7051(8)°  |
|                                                   | b = 12.4152(5) Å                                                                  | β = 91.9863(9)°  |
|                                                   | c = 13.1760(6) Å                                                                  | γ = 103.7460(9)° |
| <b>Volume</b>                                     | 1693.76(13) Å <sup>3</sup>                                                        |                  |
| <b>Z</b>                                          | 1                                                                                 |                  |
| <b>Theta range for data collection</b>            | 2.84 to 25.02°                                                                    |                  |
| <b>Index ranges</b>                               | -12 ≤ h ≤ 12, -14 ≤ k ≤ 14, -15 ≤ l ≤ 15                                          |                  |
| <b>Reflections collected</b>                      | 16418                                                                             |                  |
| <b>Independent reflections</b>                    | 5757 [R(int) = 0.0377]                                                            |                  |
| <b>Nr. of obs. independent refl; I &gt; 2σ(I)</b> | 5605                                                                              |                  |
| <b>Final R indices, observed</b>                  | R1 = 0.0655, wR2 = 0.1564                                                         |                  |
| <b>Final R-indices, all data</b>                  | R1 = 0.0666, wR2 = 0.1570                                                         |                  |

---

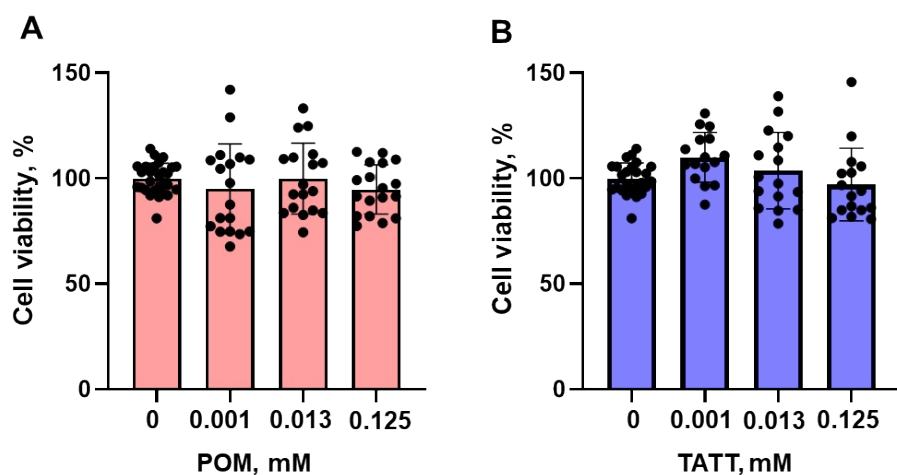

**Figure S1.** Viability of cell lines used for viral infection in the presence of POM and TATT NPs. The highest exposure concentration (0.125 mM) is equal to the highest concentration of NPs used during viral infection.

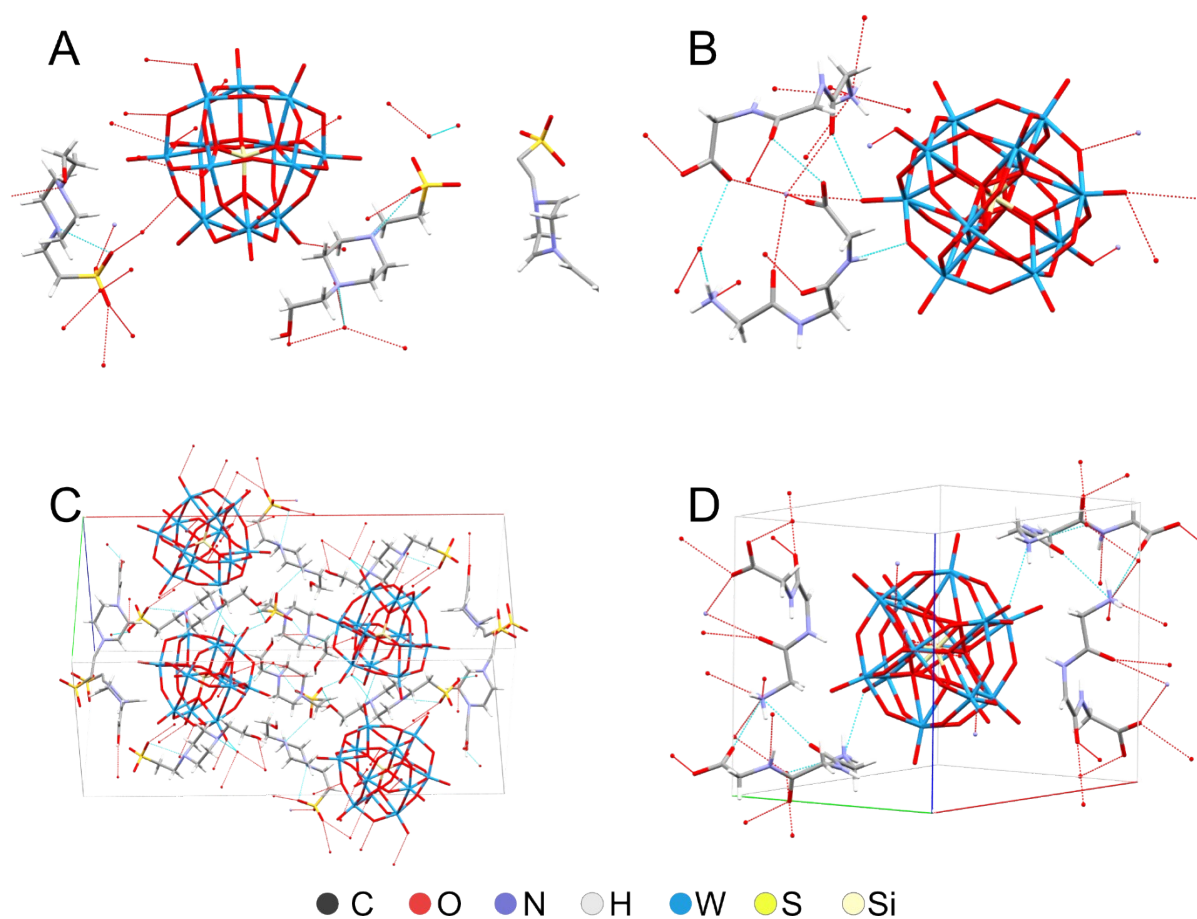

**Figure S2.** Showing hydrogen bonds for  $(\text{HEPES})_3(\text{H}_3\text{O})\text{SiW}_{12}\text{O}_{40}$  (A),  $(\text{HGly})_3\text{SiW}_{12}\text{O}_{40}$  (B) in their asymmetric unit and unit cell (C-D)
